# Supplementary material
Source: Springer Nature journal article supplement (https://www.springermedizin.de/resource/supplementary/12955_2007_387_MOESM6_ESM.pdf/9560294)

SF-36 Score (Mean Change From Baseline)

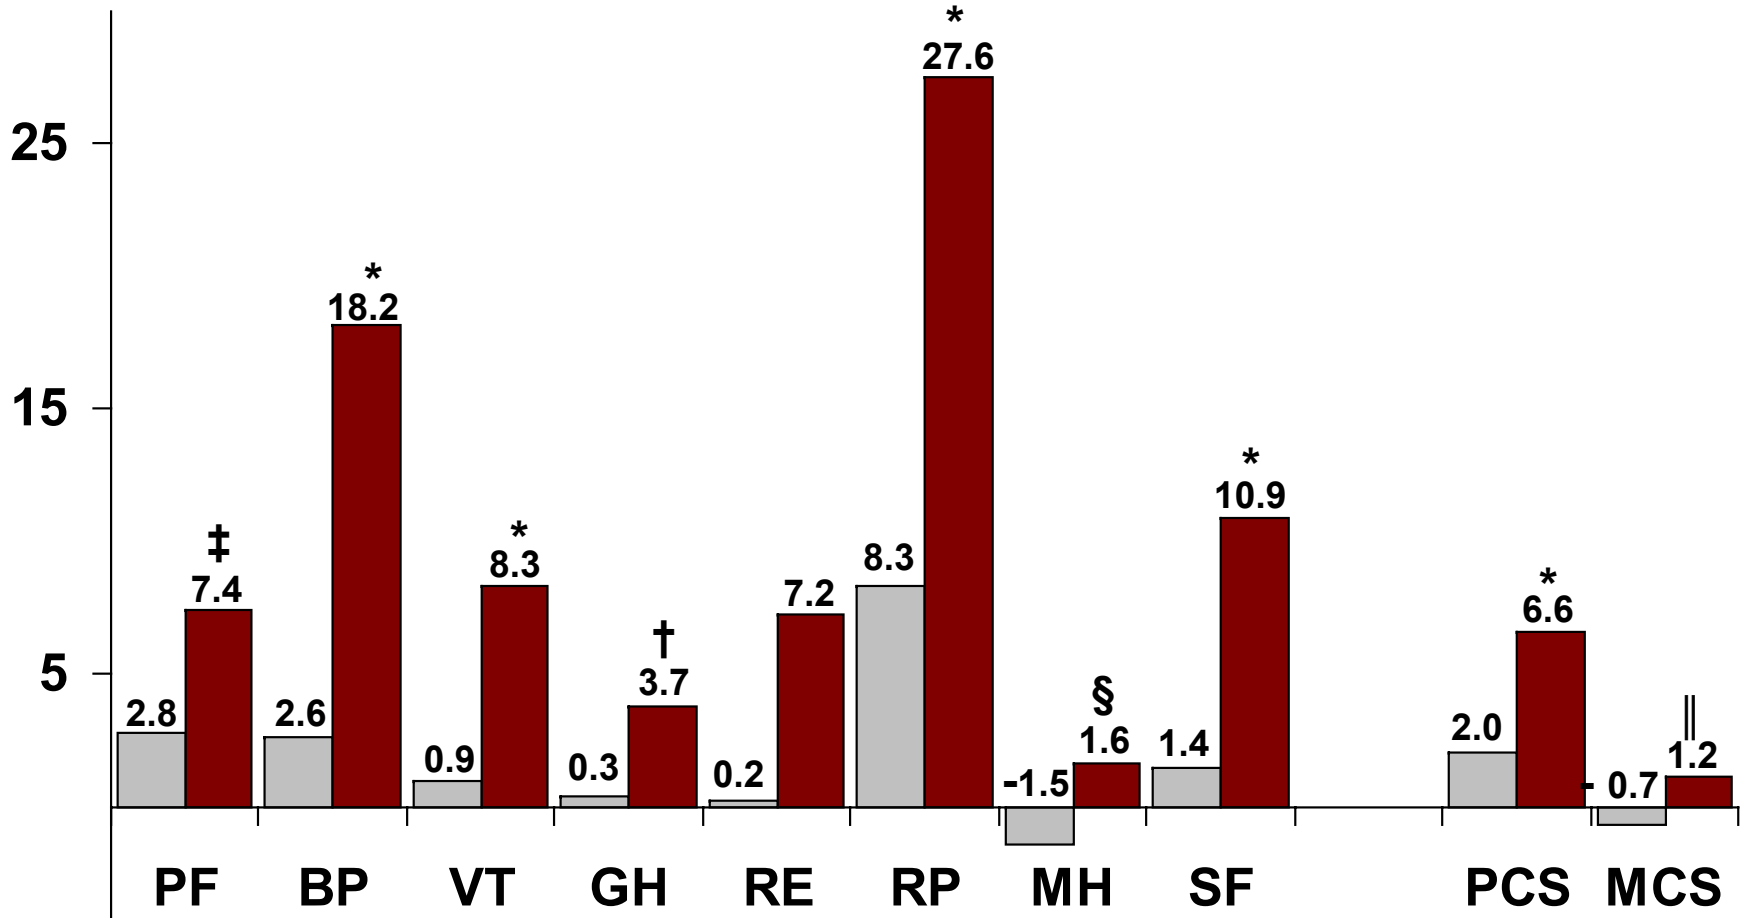

■ < 50% responders    ■ ≥ 50% responders

Supplement: MOESM6 [file 9560294]
